# Supplementary material for: A β-d-glucose pentaacetate derivative as an efficient phase selective gelator for oil spill recovery
Source: Royal Society of Chemistry journal article supplement (doi:10.1039/d2nj04673c), 2022-11-14

# **$\beta$ -D-Glucose pentaacetate derivative as an efficient phase selective gelator for oil spill recovery**

Gang-Ren Huang,<sup>‡<sup>a</sup></sup> Xue-Wen Shi,<sup>‡<sup>a</sup></sup> Ya-Min Wu,<sup>a</sup> Ban-Peng Cao,<sup>\*<sup>a</sup></sup>

Hiroaki Okamoto<sup>b</sup> and Qiang Xiao<sup>\*<sup>a</sup></sup>

<sup>a</sup> Jiangxi Key Laboratory of Organic Chemistry, Jiangxi Science and Technology Normal University, Nanchang 330013, China. Email: [caobanpeng@126.com](mailto:caobanpeng@126.com), [xiaoqiang@tsinghua.org.cn](mailto:xiaoqiang@tsinghua.org.cn)

<sup>b</sup> Graduate School of Sciences and Technology for Innovation, Yamaguchi University, 2-16-1 Tokiwadai, Ube 755-8611, Japan. Email: [oka-moto@yamaguchi-u.ac.jp](mailto:oka-moto@yamaguchi-u.ac.jp)

<sup>‡</sup> These authors contributed equally to this work and should be considered co-first authors.

# Index

|                                                                                                                                                                                           |      |
|-------------------------------------------------------------------------------------------------------------------------------------------------------------------------------------------|------|
| Figure S1. Oleogel (stable to inversion) of compound 1 at MGC .....                                                                                                                       | 1    |
| Table S1. The thermally reversible gel-sol transition temperature of oleogel at different concentration .....                                                                             | 1    |
| Figure S2. Plots of $T_{gel}$ versus Concentration of compound 1 (wt%) in tested oils .....                                                                                               | 2    |
| Figure S3. Plots of $\ln C$ versus $1/T_{gel}$ in tested oils .....                                                                                                                       | 2    |
| Table S2. Fitting parameters from the linear fit curve of the normalized values of the mean impedance magnitude for $\ln C$ and $1/T_{gel}$ tested at four kind of oils .....             | 3    |
| figure S4. Selective gelation of compound 1 in oil-aqueous mixtures systems. From left to right (a) mineral oil, (b) paraffin oil, (c) diesel oil, (d) pump oil, (e) MS, and (f) DMS..... | 3    |
| Figure S5. Mineral oil oleogel (2g, 2 wt%) of compound 1 holding the weight of 120 g of water in an inverted round-bottomed flask .....                                                   | 4    |
| Figure S6. UV-Vis absorption spectral changes of compound 1 in solution and gel phase.....                                                                                                | 4    |
| Figure S7. Fourier transform infrared spectroscopy (FTIR) spectra.....                                                                                                                    | 5    |
| Figure S8. NMR spectra.....                                                                                                                                                               | 6-10 |

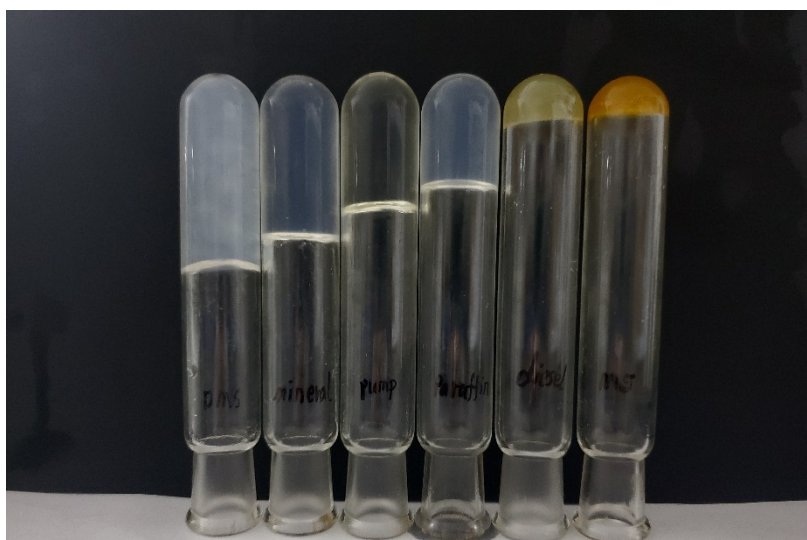

(a) (b) (c) (d) (e) (f)

**Figure S1. Oleogel (stable to inversion) of compound 1 at MGC. From left to right (a) DMS, (b) mineral oil, (c) pump oil, (d) paraffin oil, (e) diesel oil, and (f) MS.**

**Table S1. The thermally reversible gel-sol transition temperature of oleogel at different concentration**

| Concentration<br>Solvent | 5 wt%   | 4 wt%   | 3 wt%   | 2 wt%   | 1 wt%   |
|--------------------------|---------|---------|---------|---------|---------|
|                          | DMS     | 153.7°C | 146.4°C | 139.6°C | 127.5°C |
| Mineral oil              | 148.3°C | 141.5°C | 134.7°C | 123.3°C | 106.3°C |
| Paraffin oil             | 144.2°C | 138.3°C | 131.4°C | 119.5°C | 101.8°C |
| MS                       | 136.9°C | 129.6°C | 118.7°C | 102.4°C | 81.6°C  |

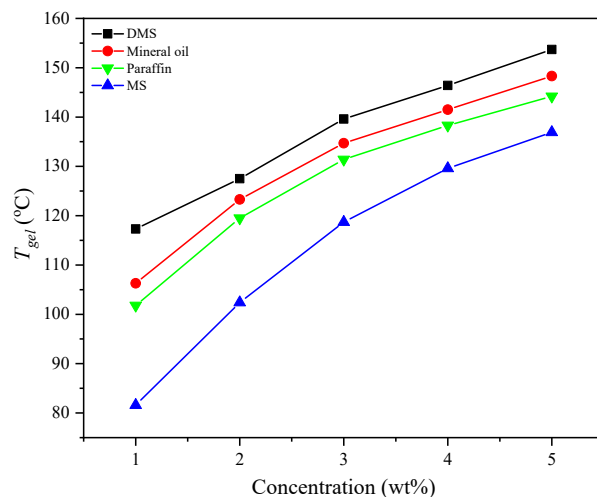

**Figure S2. Plots of Tgel versus Concentration of compound 1 (wt%) in tested oils**

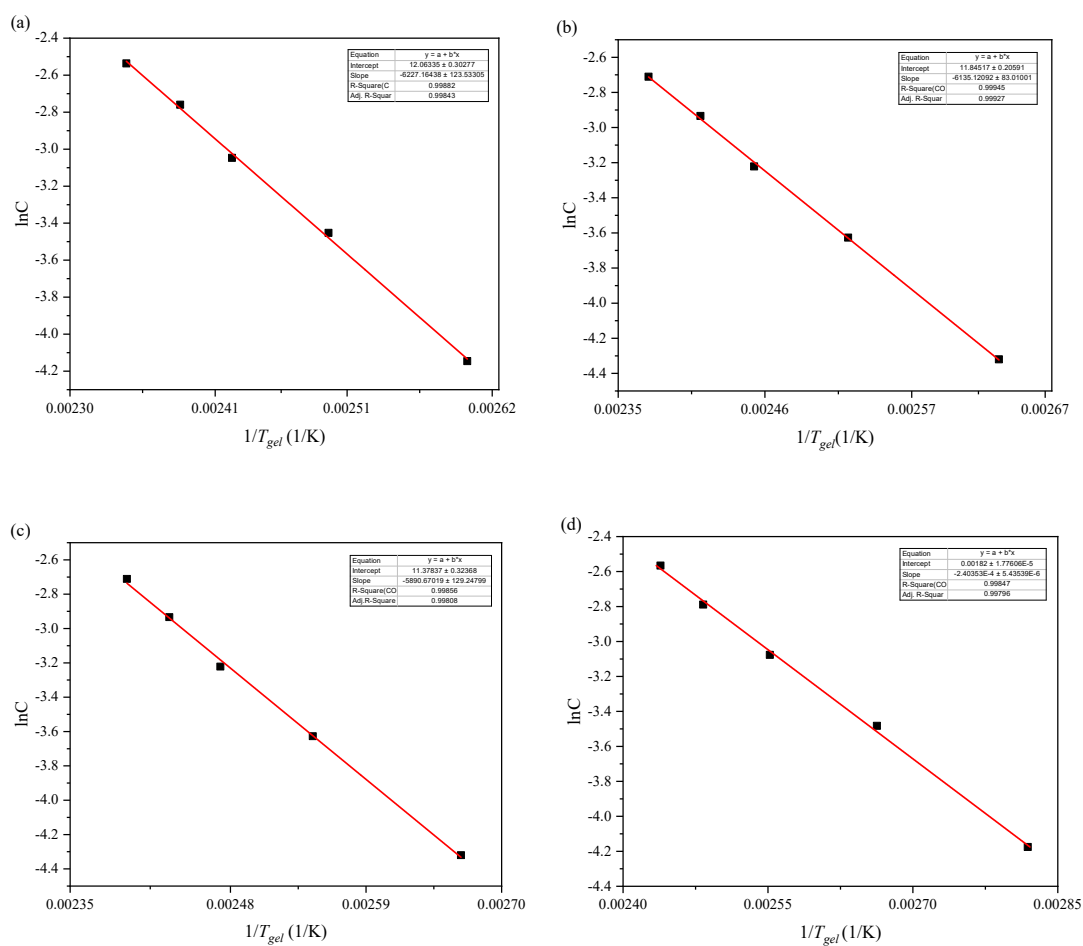

**Figure S3. Plots of lnC versus 1/Tgel in tested oils. (a) DMS, (b) Mineral oil, (c) Paraffin oil and (d) MS**

**Table S2. Fitting parameters from the linear fit curve of the normalized values of the mean impedance magnitude for InC and 1/Tgel tested at four kind of oils**

| Fitting parameters | DMS                         | Mineral oil                | Paraffin oil                | MS                           |
|--------------------|-----------------------------|----------------------------|-----------------------------|------------------------------|
| Equation           | $y = a*x+b$                 |                            |                             |                              |
| Intercept          | $12.06335 \pm 0.30277$      | $11.84517 \pm 0.20591$     | $11.37837 \pm 0.32368$      | $0.00182 \pm 1.77606E-5$     |
| Slope              | $-6227.16438 \pm 123.53305$ | $-6135.12092 \pm 83.01001$ | $-5890.67019 \pm 129.24799$ | $-2.40353E-4 \pm 5.43539E-6$ |
| R-Square (COD)     | 0.99882                     | 0.99945                    | 0.99856                     | 0.99847                      |
| Adj. R-Square      | 0.99843                     | 0.99927                    | 0.99808                     | 0.99796                      |

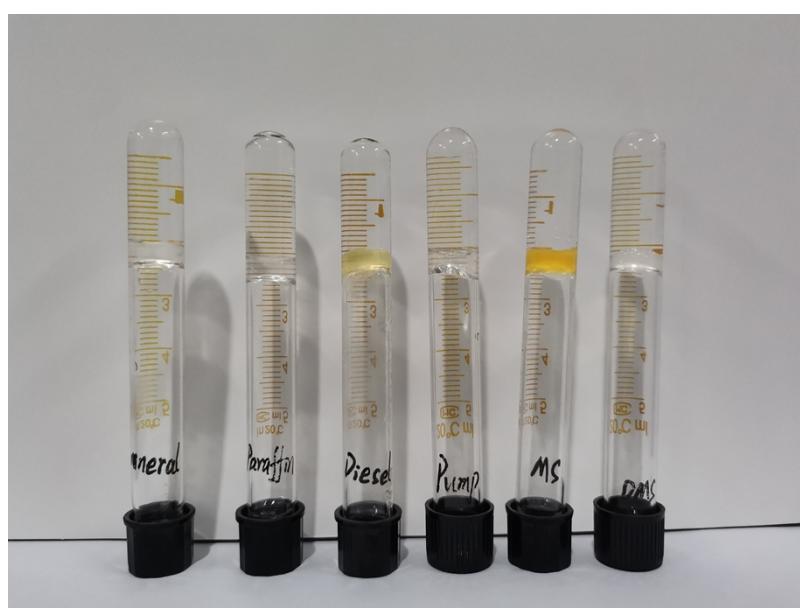

**Figure S4. Selective gelation of compound 1 in oil-aqueous mixtures systems. From left to right (a) mineral oil, (b) paraffin oil, (c) diesel oil, (d) pump oil, (e) MS, and (f) DMS**

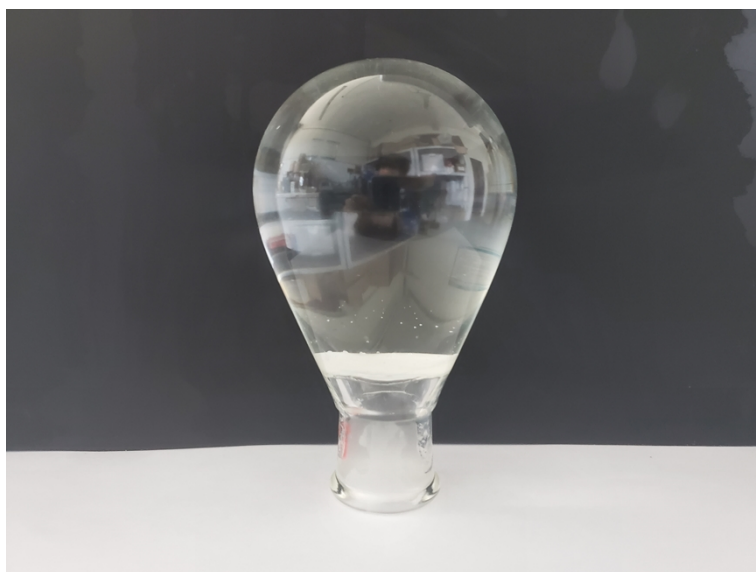

**Figure S5. Mineral oil oleogel (2g, 2 wt%) of compound 1 holding the weight of 120 g of water in an inverted round-bottomed flask**

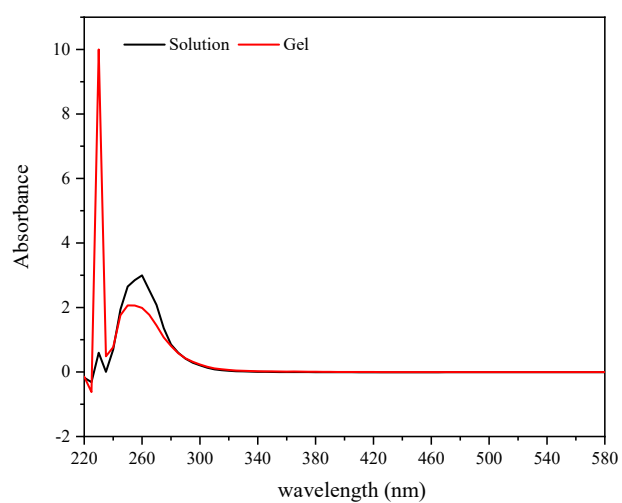

**Figure S6. UV-Vis absorption spectral changes of compound 1 in solution and gel phase**

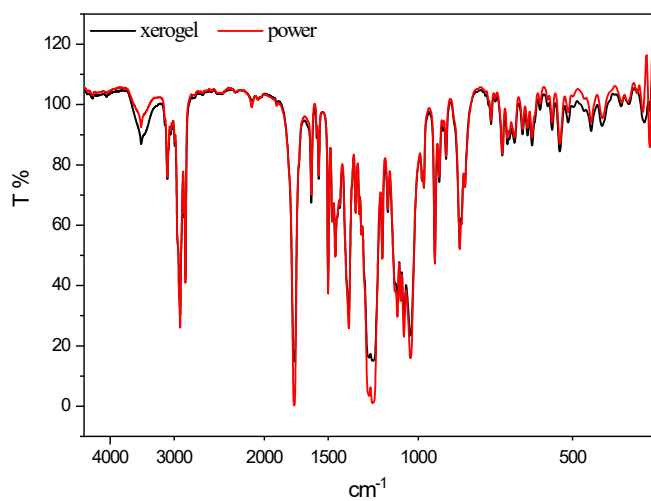

**Figure S7. Fourier transform infrared spectroscopy (FTIR) spectra. Xerogel obtained from mineral oil.**

**Figure S8. NMR spectra**

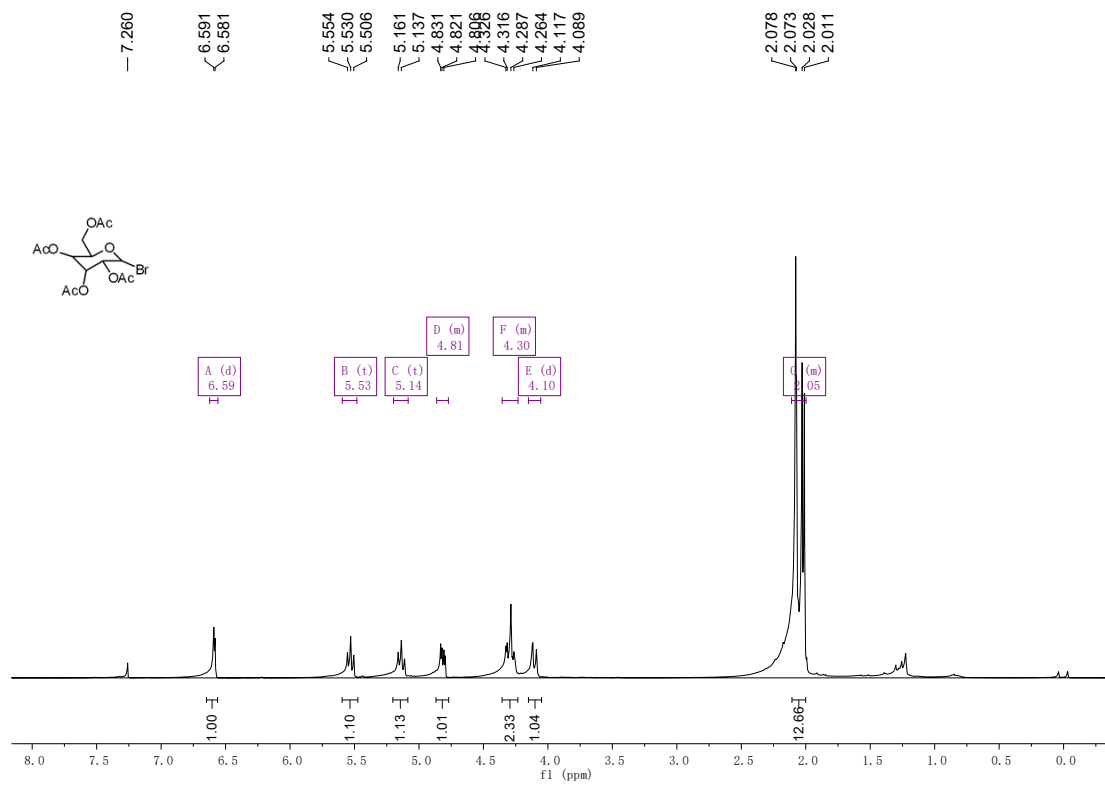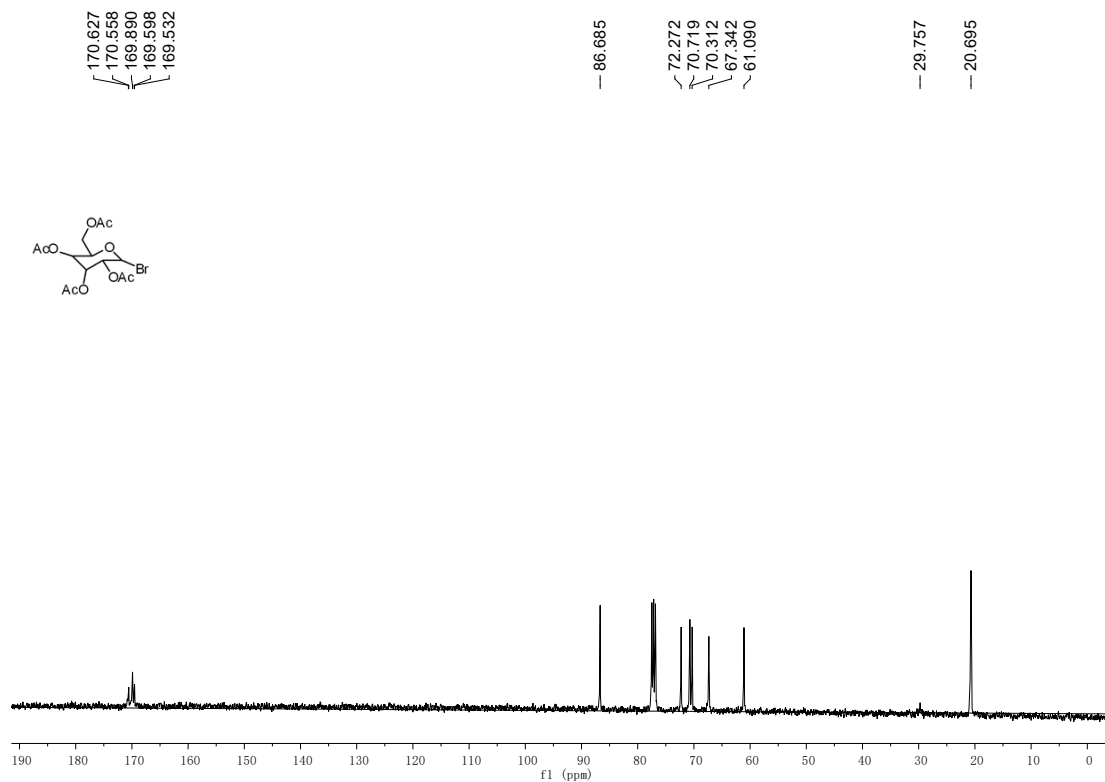



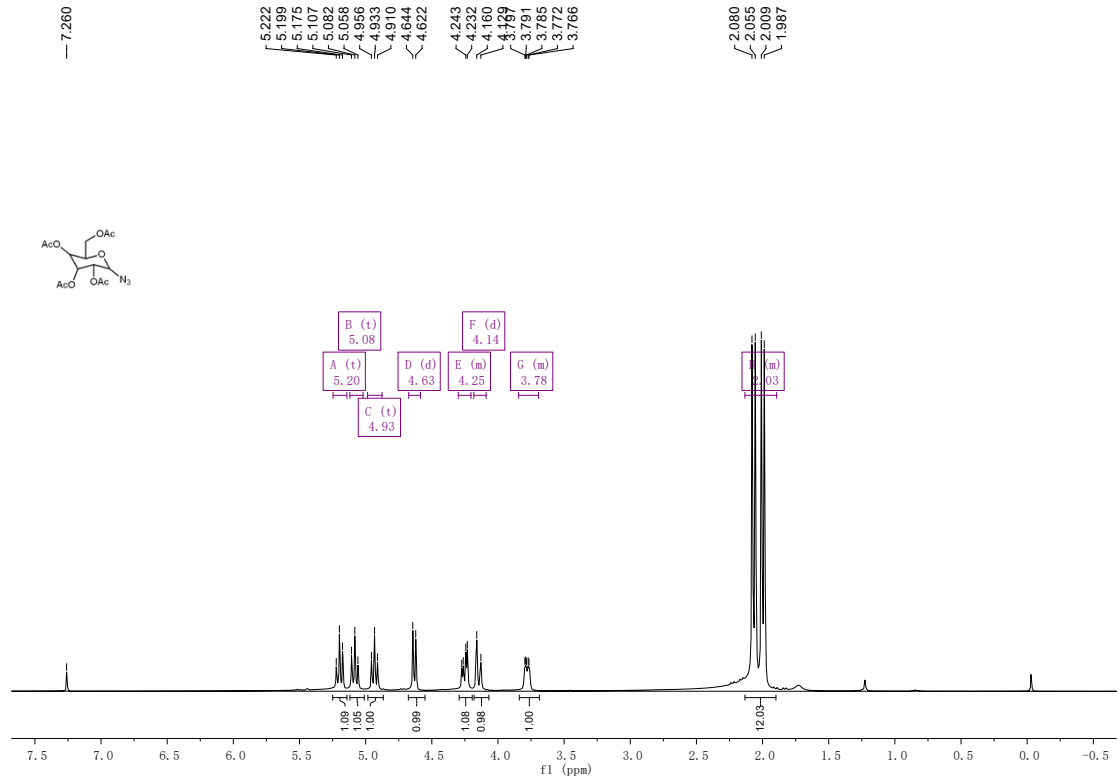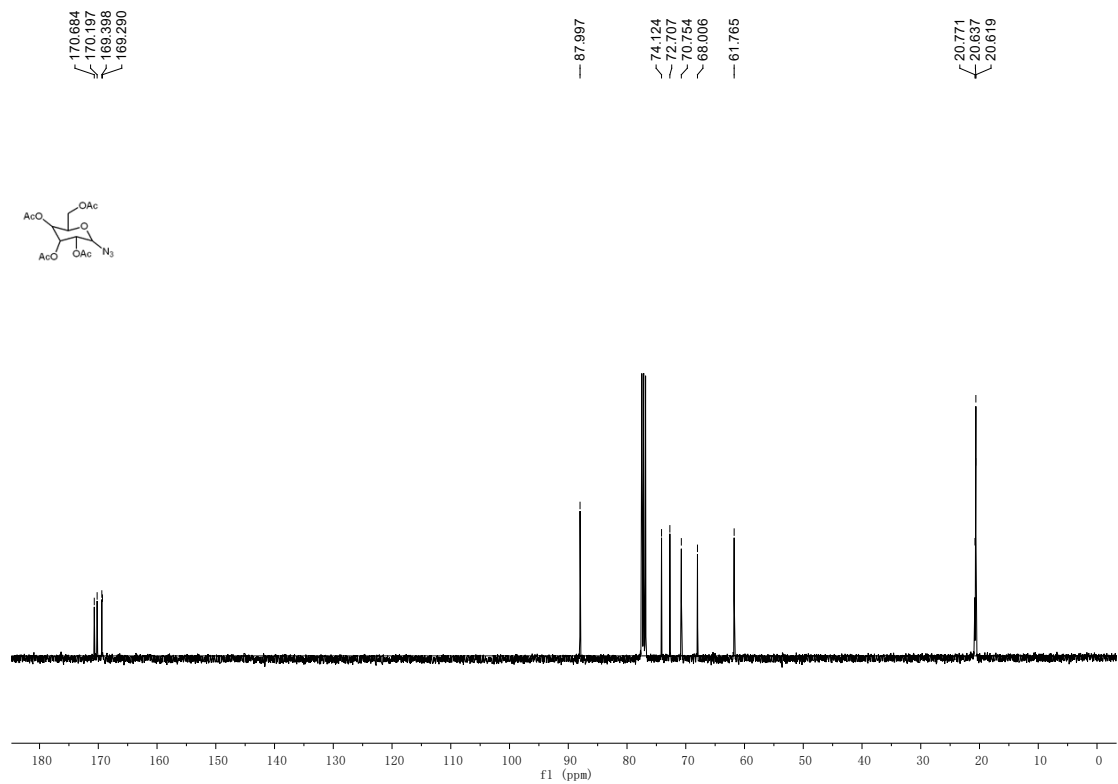

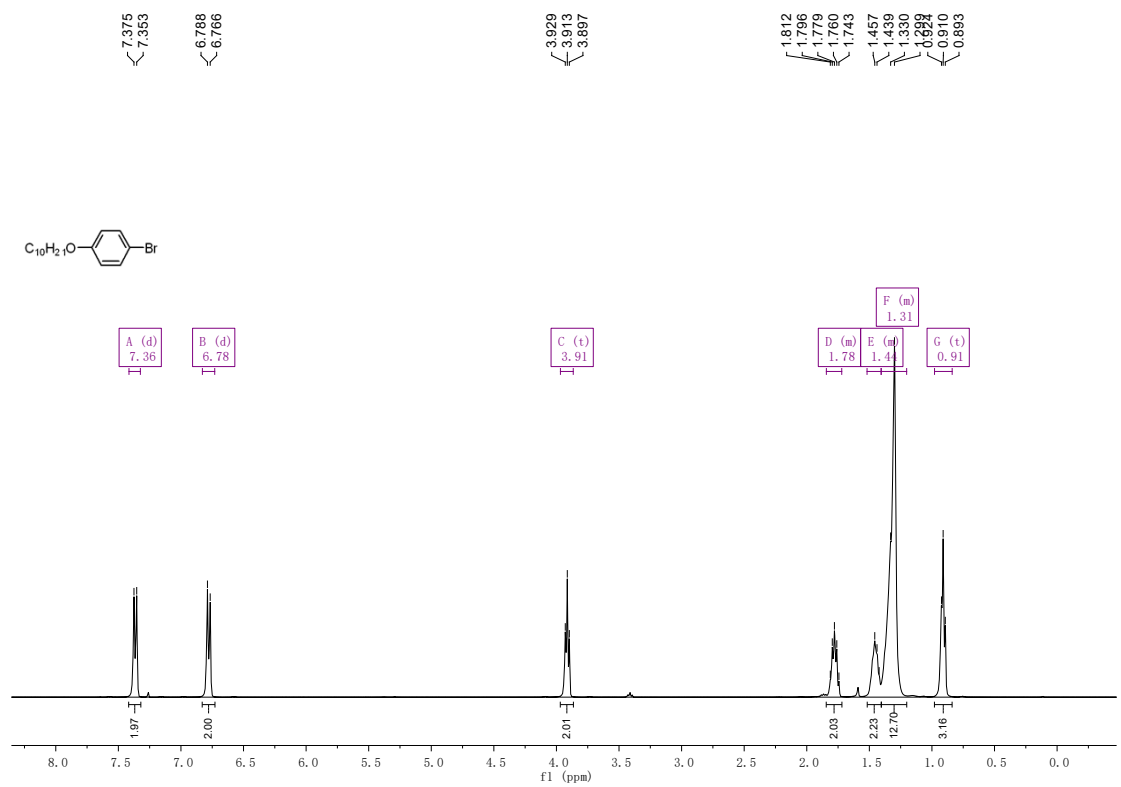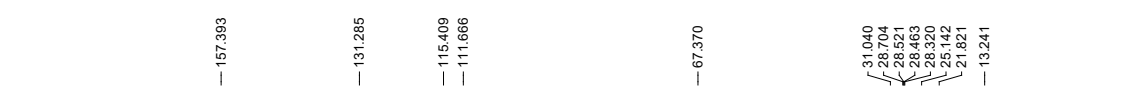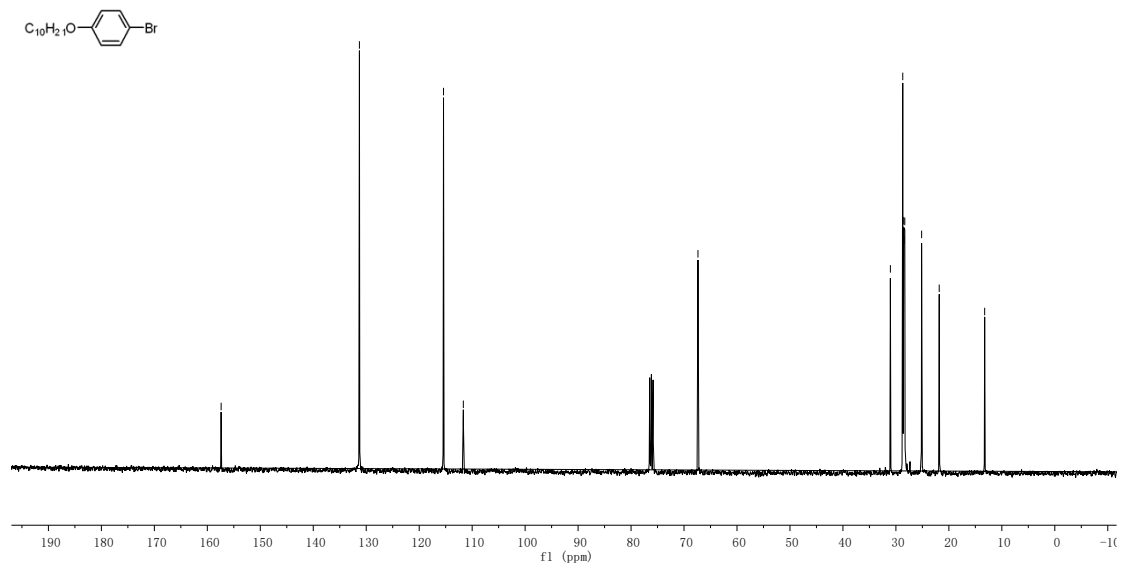

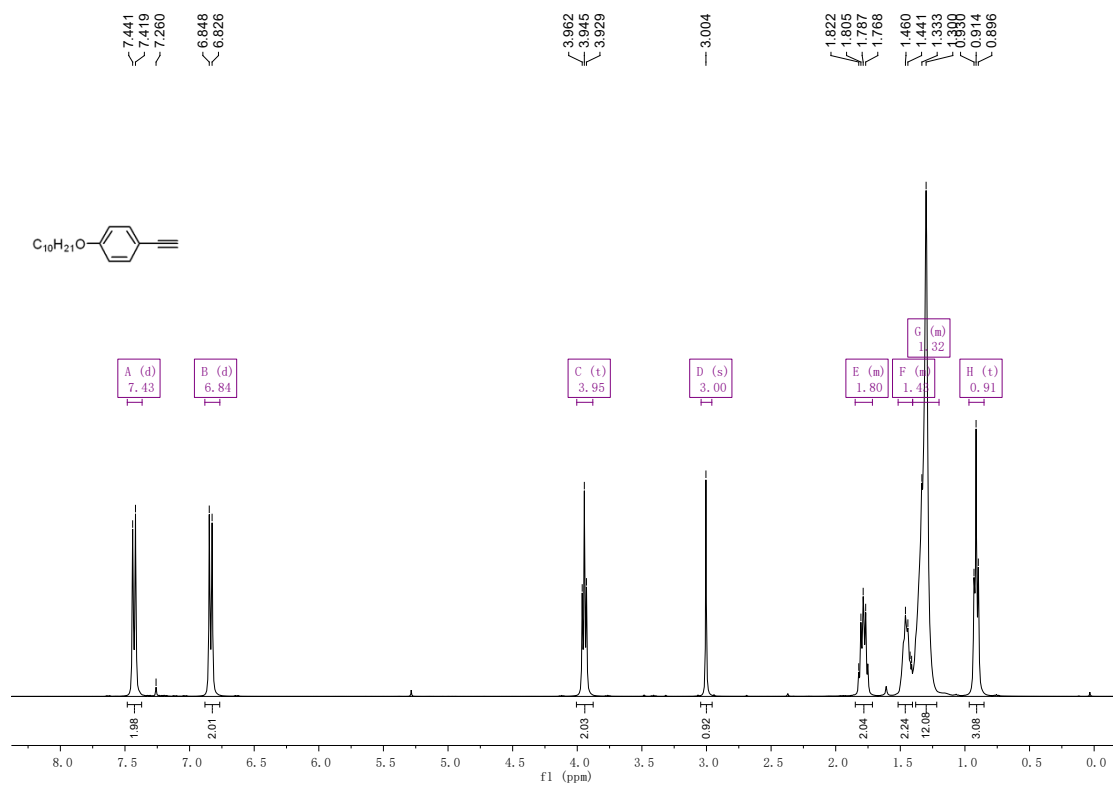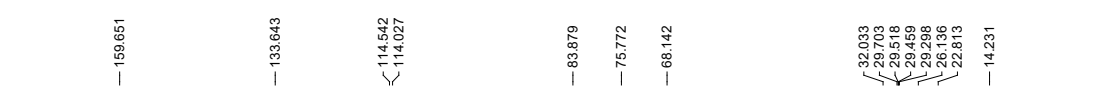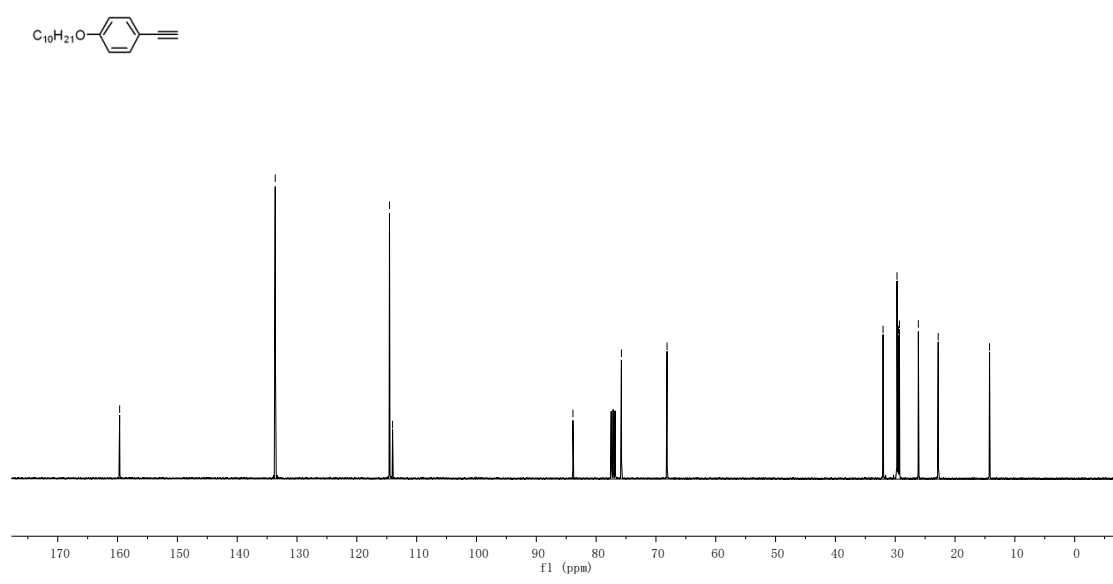

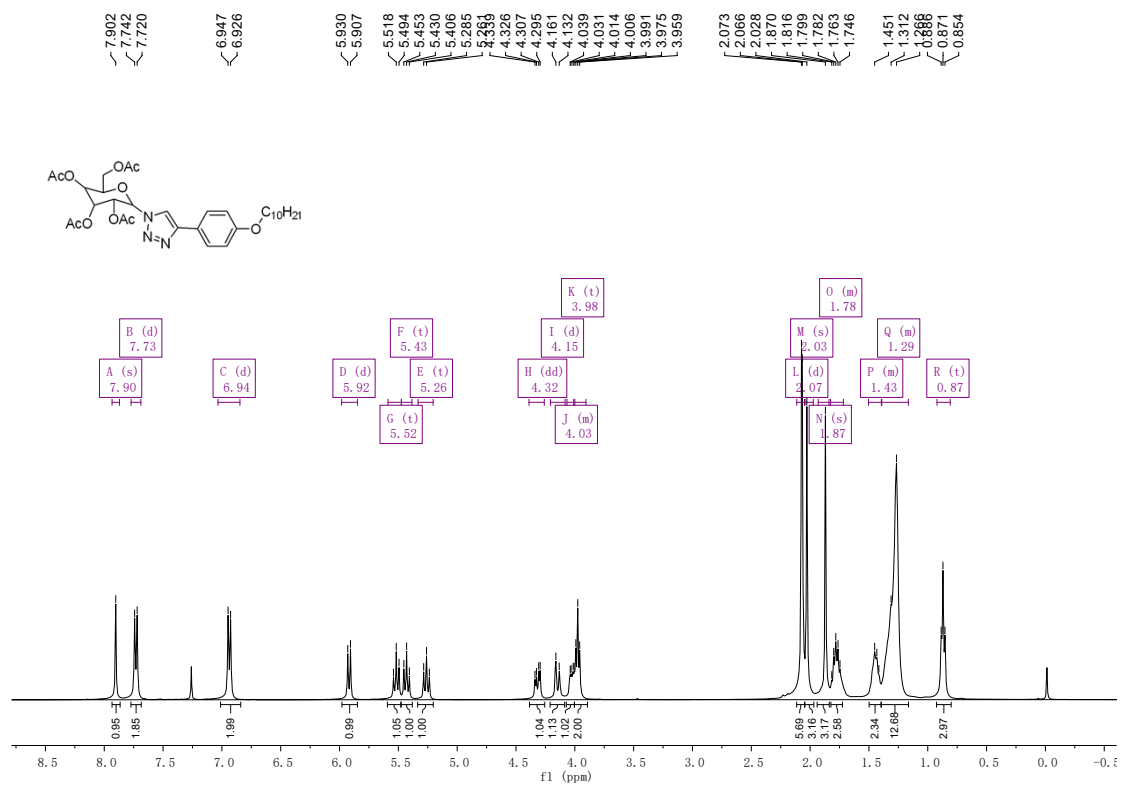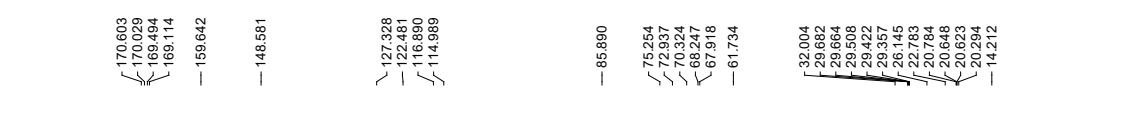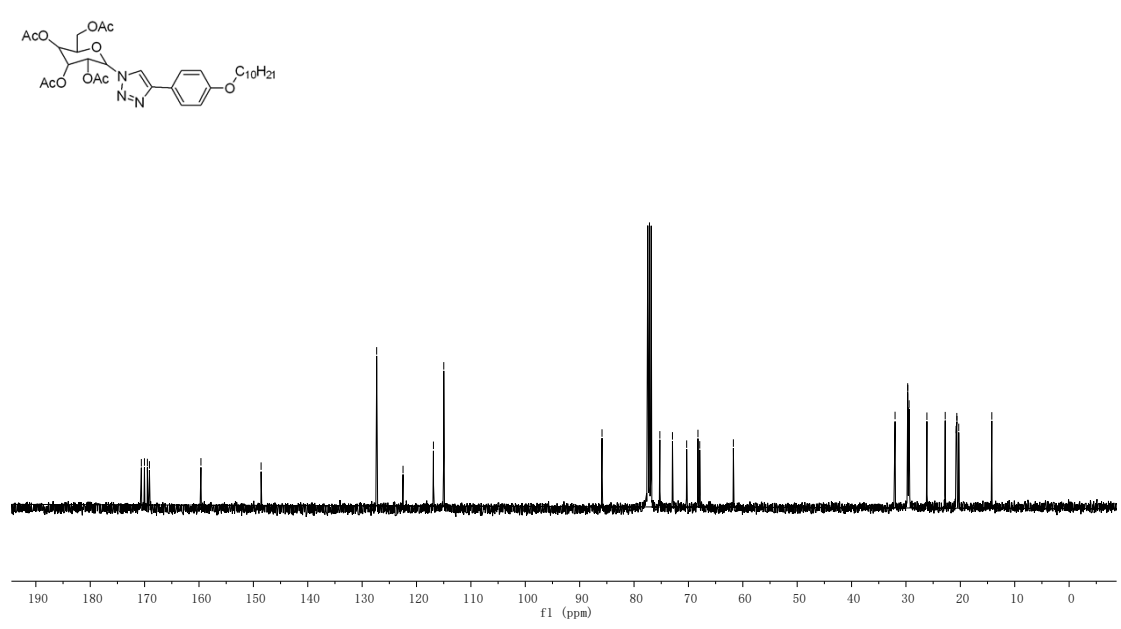

Supplement: d2nj04673c2.pdf [file d2nj04673c2.pdf]
